# Supplementary material for: Influence of extraction technology on rapeseed oil functional quality: a study on rapeseed polyphenols
Source: Royal Society of Chemistry journal article supplement (doi:10.1039/d1fo01507a), 2021-12-10
Supplement: d1fo01507a1.pdf [file d1fo01507a1.pdf]

## Supplementary Data

### **Influence of extraction technology on rapeseed oil functional quality: a study on rapeseed polyphenols**

Mengxue He<sup>1</sup>, Binbin Nian<sup>1</sup>, Jiachen Shi<sup>1</sup>, Xian Sun<sup>1</sup>, Runfeng Du<sup>1</sup>, Chin Ping Tan<sup>2</sup>,  
Yong-Jiang Xu<sup>1\*</sup>, Yuanfa Liu<sup>1\*</sup>

<sup>1</sup> State Key Laboratory of Food Science and Technology, School of Food Science and Technology, National Engineering Research Center for Functional Food, National Engineering Laboratory for Cereal Fermentation Technology, Collaborative Innovation Center of Food Safety and Quality Control in Jiangsu Province, Jiangnan University

<sup>2</sup>Department of Food Technology, Faculty of Food Science and Technology, Universiti Putra Malaysia, 43400 Seri Kembangan, Malaysia

#### **LC-MS analysis**

LC-MS/MS analysis was performed on a LC-MS/MS analysis was performed on a AB SCIEX Exion Ultra Performance Liquid Chromatography system equipped with equipped with AB SCIEX Triple TOF 5600+ mass detector. The separation chromatographic column was a reversed-phase Thermo Hypersil GOLD C18 (100 mm × 2.1 mm, 1.9 μm). Elution conditions: phase A was water, and phase B was 0.1% (v:v) acetic acid in acetonitrile. The gradient elution process was: 0-0.5 min, 10% B; 0.5-15

---

\* Corresponding author'E-mail: [yjxutju@gmail.com](mailto:yjxutju@gmail.com) (Y. J Xu)

\* Corresponding author'E-mail: [yfliu@jiangnan.edu.cn](mailto:yfliu@jiangnan.edu.cn) (Y Liu)

min, 10-55% B; 15-15.5 min, 55-100% B; 15.5-17 min, 100% B; 17-17.5 min, 100-10% B; and 17.5-20 min, 10% B. Column temperature: 35°C; Flow rate: 0.3 mL/min; Injection volume: 2 µL. The mass spectrometry parameters were set as follows: electrospray ion source (ESI), capillary voltage 4.5 kV, capillary temperature 500°C, spray gas N<sub>2</sub> and collision gas Ar, Ion Source Gas 1 50, Ion Source Gas 2 50, Curtain Gas 35.

### **Method validation**

#### **Standard curves**

The scan mode, molecular weight, structural formula and retention time of the phenolic compounds were shown in Table 1S. The standard curve equation were constructed from a set of concentrations in each standard, involving three replicate measurements. A linear regression with  $r^2 > 0.9826$  was obtained in all relevant ranges (Table 2S).

#### **Limit of detection (LOD) and limit of quantitation (LOQ)**

The signal-to-noise ratio was used to determine the LOD and LOQ. When the signal-to-noise ratio (S/N) is 10, the concentration is determined to be LOQ, and when the signal-to-noise ratio is 3, the concentration is determined to be LOD. The LODs ranged from 0.004 to 0.012 µg/mL for 12 phenolic compounds (Table 2S).

#### **Recovery rate**

Twelve kinds of standards with different contents (0.5 µg/g, 2 µg/g and 10 µg/g ) were added to the rapeseed oil, and then Diol-SPE column was applied to extract polyphenols, finally LC-MS/MS assay was used to determine phenolic compounds contents. The recovery rates were calculated using the calibration concentration (blank

vs sample), and addition contents. The recovery rates ranged from 80.78% to 112.52% (Table 3S).

### **Precisions**

Precisions include intra-day precisions and inter-day precisions, intra-day precision were measured in the same day, while inter-day precision was calculated by measuring each sample for 5 consecutive days. The calculation results of precision were evaluated by relative standard deviation (RSD), and the precision for all the samples were not more than 12% RSD (Table 3S).

**Table 1S** The scan mode, molecular weight, structural formula and retention time of the phenolic compounds

| Compound                 | RT/mi<br>n | Scan mode          | m/z      | Formula                                         |
|--------------------------|------------|--------------------|----------|-------------------------------------------------|
| Ferulic acid             | 3.24       | [M-H] <sup>-</sup> | 193.0495 | C <sub>10</sub> H <sub>4</sub> O <sub>4</sub>   |
| Caffeic acid             | 3.29       | [M-H] <sup>-</sup> | 179.0339 | C <sub>9</sub> H <sub>8</sub> O <sub>4</sub>    |
| Sinapine                 | 1.91       | [M-H] <sup>-</sup> | 311.1727 | C <sub>16</sub> H <sub>24</sub> NO <sub>5</sub> |
| Sinapic acid             | 5.12       | [M-H] <sup>+</sup> | 223.0601 | C <sub>11</sub> H <sub>12</sub> O <sub>5</sub>  |
| Syringic acid            | 3.43       | [M-H] <sup>-</sup> | 197.0445 | C <sub>9</sub> H <sub>10</sub> O <sub>5</sub>   |
| Cinnamic acid            | 8.57       | [M-H] <sup>-</sup> | 147.0441 | C <sub>9</sub> H <sub>8</sub> O <sub>2</sub>    |
| Vanillic acid            | 3.29       | [M-H] <sup>-</sup> | 167.0339 | C <sub>8</sub> H <sub>8</sub> O <sub>4</sub>    |
| p-Coumaric acid          | 4.59       | [M-H] <sup>-</sup> | 163.0390 | C <sub>9</sub> H <sub>8</sub> O <sub>3</sub>    |
| Gallic acid              | 1.26       | [M-H] <sup>-</sup> | 169.0132 | C <sub>7</sub> H <sub>6</sub> O <sub>5</sub>    |
| Chlorogenic acid         | 4.59       | [M-H] <sup>-</sup> | 353.0867 | C <sub>16</sub> H <sub>18</sub> O <sub>9</sub>  |
| Salicylic acid           | 6.27       | [M-H] <sup>-</sup> | 137.0233 | C <sub>7</sub> H <sub>6</sub> O <sub>3</sub>    |
| p-Hydroxybenzoic<br>acid | 2.78       | [M-H] <sup>-</sup> | 137.0233 | C <sub>7</sub> H <sub>6</sub> O <sub>3</sub>    |

**Table 2S** Linear equation, R<sup>2</sup>, linear ranges, LODs, and LOQs of the phenolic compounds

| Compound              | Linear range         | R <sup>2</sup> | Range<br>(µg/mL) | LOD<br>(µg/mL) | LOQ<br>(µg/mL) |
|-----------------------|----------------------|----------------|------------------|----------------|----------------|
| Ferulic acid          | $y = 13.36x + 25.24$ | 0.9904         | 0.04-80          | 0.004          | 0.013          |
| Caffeic acid          | $y = 37.02x - 31.15$ | 0.9976         | 0.04-80          | 0.012          | 0.040          |
| Sinapine              | $y = 1.38x - 10.20$  | 0.9826         | 0.04-80          | 0.006          | 0.019          |
| Sinapic acid          | $y = 30.56x + 12.35$ | 0.9835         | 0.04-80          | 0.006          | 0.019          |
| Syringic acid         | $y = 17.70x + 13.84$ | 0.9866         | 0.04-80          | 0.004          | 0.013          |
| Cinnamic acid         | $y = 24.27x - 21.26$ | 0.9913         | 0.04-80          | 0.004          | 0.013          |
| Vanillic acid         | $y = 10.56x + 42.95$ | 0.9895         | 0.04-80          | 0.006          | 0.019          |
| p-Coumaric acid       | $y = 38.13x - 19.03$ | 0.9833         | 0.04-80          | 0.008          | 0.027          |
| Gallic acid           | $y = 10.20x - 26.67$ | 0.9917         | 0.04-80          | 0.012          | 0.040          |
| Chlorogenic acid      | $y = 9.07x + 7.07$   | 0.9868         | 0.04-80          | 0.004          | 0.013          |
| Salicylic acid        | $y = 19.54x - 37.81$ | 0.9838         | 0.04-80          | 0.006          | 0.019          |
| p-Hydroxybenzoic acid | $y = 7.13x - 4.32$   | 0.9933         | 0.04-80          | 0.004          | 0.013          |

**Table 3S** Recovery rate and precision of the phenolic compounds

| Compound              | Adding standard matter amount ( $\mu\text{g/g}$ ) | Recovery rate (%) | RSD %               |                     |
|-----------------------|---------------------------------------------------|-------------------|---------------------|---------------------|
|                       |                                                   |                   | Intra-day precision | Inter-day precision |
| Ferulic acid          | 0.5                                               | 85.87             | 1.26                | 3.14                |
|                       | 2                                                 | 90.54             | 2.44                | 4.96                |
|                       | 10                                                | 93.94             | 2.35                | 9.42                |
| Caffeic acid          | 0.5                                               | 75.48             | 2.93                | 5.54                |
|                       | 2                                                 | 83.59             | 2.73                | 4.27                |
|                       | 10                                                | 85.84             | 1.91                | 6.62                |
| Sinapine              | 0.5                                               | 108.76            | 1.86                | 7.12                |
|                       | 2                                                 | 112.52            | 4.71                | 7.34                |
|                       | 10                                                | 112.36            | 2.42                | 8.29                |
| Sinapic acid          | 0.5                                               | 92.37             | 1.61                | 5.79                |
|                       | 2                                                 | 95.14             | 5.08                | 5.70                |
|                       | 10                                                | 96.15             | 6.01                | 9.69                |
| Syringic acid         | 0.5                                               | 75.83             | 7.16                | 10.05               |
|                       | 2                                                 | 72.98             | 1.88                | 7.31                |
|                       | 10                                                | 83.48             | 4.28                | 6.88                |
| Cinnamic acid         | 0.5                                               | 84.96             | 2.68                | 10.28               |
|                       | 2                                                 | 92.61             | 3.44                | 7.69                |
|                       | 10                                                | 96.10             | 4.21                | 5.28                |
| Vanillic acid         | 0.5                                               | 80.39             | 1.81                | 3.91                |
|                       | 2                                                 | 87.31             | 8.91                | 11.34               |
|                       | 10                                                | 100.51            | 5.74                | 6.29                |
| p-Coumaric acid       | 0.5                                               | 80.78             | 2.61                | 4.72                |
|                       | 2                                                 | 89.42             | 7.70                | 11.23               |
|                       | 10                                                | 96.62             | 4.51                | 9.84                |
| Gallic acid           | 0.5                                               | 83.01             | 6.94                | 8.54                |
|                       | 2                                                 | 95.36             | 5.62                | 7.18                |
|                       | 10                                                | 97.28             | 1.60                | 6.67                |
| Chlorogenic acid      | 0.5                                               | 79.23             | 4.61                | 11.32               |
|                       | 2                                                 | 83.58             | 3.81                | 7.21                |
|                       | 10                                                | 88.64             | 1.73                | 4.18                |
| Salicylic acid        | 0.5                                               | 89.20             | 3.76                | 5.87                |
|                       | 2                                                 | 89.70             | 4.23                | 5.95                |
|                       | 10                                                | 96.12             | 1.81                | 3.78                |
| p-Hydroxybenzoic acid | 0.5                                               | 88.25             | 4.50                | 5.18                |
|                       | 2                                                 | 89.76             | 4.61                | 5.04                |
|                       | 10                                                | 97.83             | 2.40                | 5.76                |
